# Supplementary material
Source: Springer Nature journal article supplement (https://www.springermedizin.de/resource/supplementary/12916_2009_253_MOESM5_ESM.pdf/9599494)

# Western/Lakeside

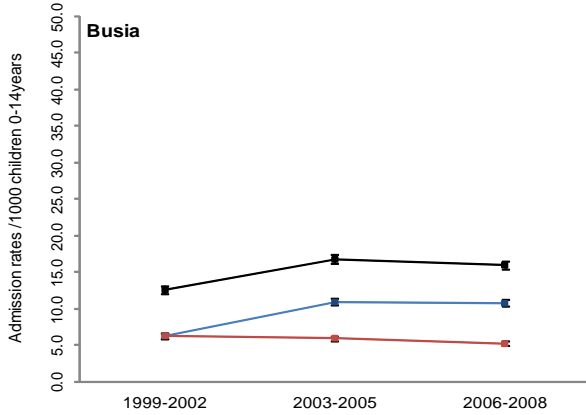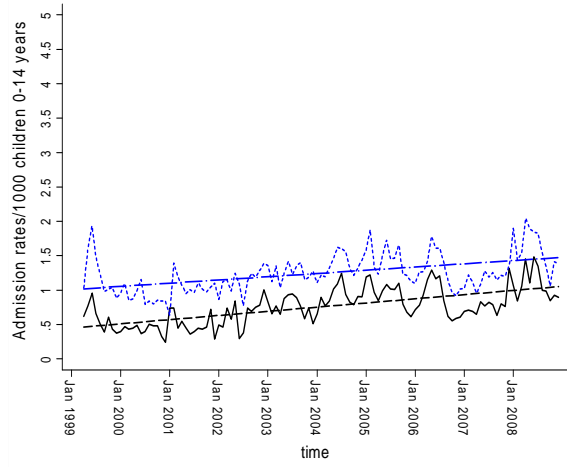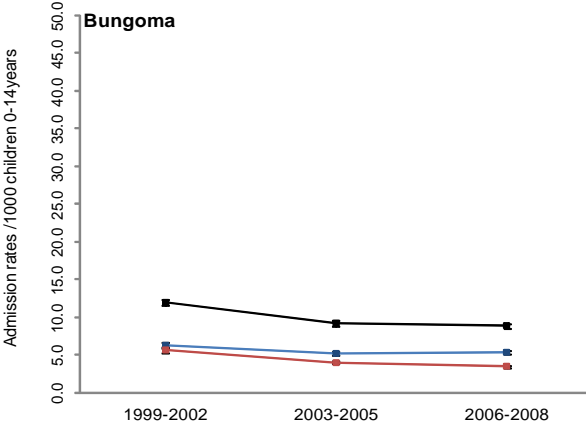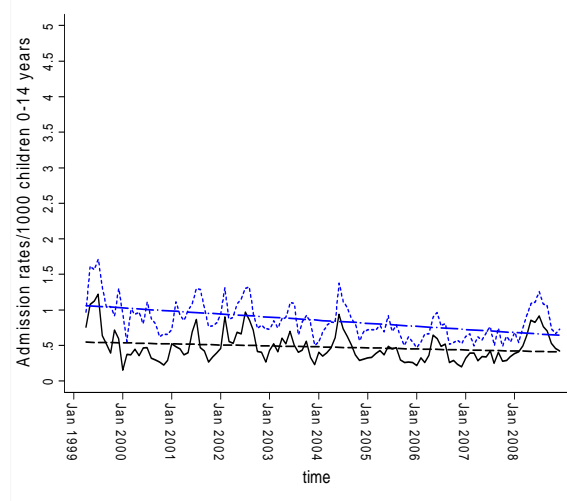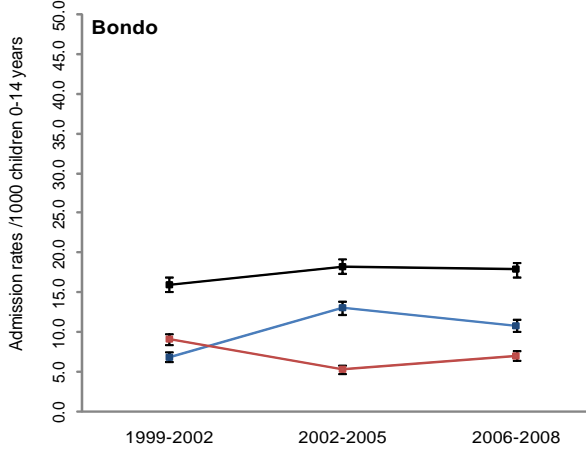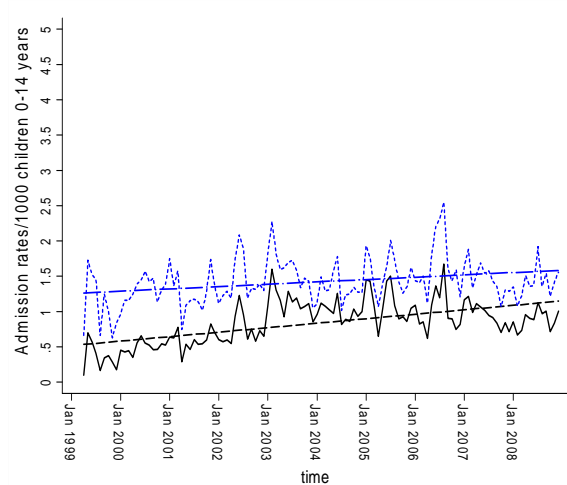

Supplement: MOESM5 [file 9599494]
